# Supplementary material
Source: PubMed Central journal article supplement (PMC8662900)
Supplement: 12909_2021_3043_MOESM2_ESM.pdf [file 12909_2021_3043_MOESM2_ESM.pdf]

Supplemental Material: Raw Data Subjective Judgment of Knowledge and Interest in Disaster Medicine

| code | group | measure/poin | sex | semester | preexperience item 1 | preexperience item 2 | preexperience item 3 | preexperience item 4 | preexperience item 5 | knowledge item 1 | knowledge item 2 | knowledge item 3 | knowledge item 4 | knowledge item 5 | knowledge item 6 | knowledge item 7 | knowledge item 8 | knowledge item 9 | knowledge item 10 | knowledge item 11 | knowledge item 12 | knowledge item 13 | knowledge item 14 | interest item 1 | interest item 2 | interest item 3 | interest item 4 |
|------|-------|--------------|-----|----------|----------------------|----------------------|----------------------|----------------------|----------------------|------------------|------------------|------------------|------------------|------------------|------------------|------------------|------------------|------------------|-------------------|-------------------|-------------------|-------------------|-------------------|-----------------|-----------------|-----------------|-----------------|
| 1    | 0     | 1            | 2   | 9        | 2                    | 2                    | 3                    | 1                    | 2                    | 2                | 3                | 2                | 2                | 2                | 2                | 3                | 1                | 2                | 2                 | 3                 | 2                 | 2                 | 2                 | 4               | 5               | 4               | 4               |
| 2    | 0     | 1            | 2   | 7        | 2                    | 1                    | 1                    | 1                    | 1                    | 2                | 1                | 2                | 2                | 3                | 3                | 3                | 2                | 2                | 3                 | 3                 | 3                 | 1                 | 4                 | 4               | 4               | 3               |                 |
| 3    | 0     | 1            | 1   | 8        | 2                    | 1                    | 1                    | 1                    | 2                    | 2                | 2                | 2                | 2                | 2                | 2                | 2                | 2                | 2                | 4                 | 2                 | 2                 | 3                 | 2                 | 5               | 5               | 5               |                 |
| 4    | 0     | 1            | 1   | 8        | 2                    | 2                    | 2                    | 2                    | 2                    | 2                | 4                | 2                | 2                | 4                | 4                | 1                | 2                | 4                | 4                 | 1                 | 2                 | 2                 | 5                 | 5               | 5               | 2               |                 |
| 5    | 0     | 1            | 2   | 7        | 1                    | 1                    | 1                    | 1                    | 1                    | 2                | 1                | 2                | 2                | 2                | 2                | 2                | 1                | 1                | 1                 | 3                 | 1                 | 2                 | 4                 | 3               | 3               | 2               |                 |
| 6    | 0     | 1            | 2   | 7        | 2                    | 2                    | 2                    | 2                    | 1                    | 2                | 3                | 5                | 5                | 2                | 4                | 4                | 4                | 4                | 4                 | 2                 | 2                 | 2                 | 3                 | 4               | 4               | 3               |                 |
| 7    | 0     | 1            | 2   | 6        | 2                    | 1                    | 1                    | 1                    | 2                    | 3                | 3                | 3                | 2                | 2                | 2                | 2                | 1                | 3                | 1                 | 4                 | 4                 | 2                 | 4                 | 2               | 3               | 3               |                 |
| 8    | 0     | 1            | 2   | 9        | 2                    | 1                    | 1                    | 1                    | 1                    | 2                | 4                | 2                | 1                | 1                | 2                | 1                | 1                | 1                | 2                 | 1                 | 2                 | 1                 | 1                 | 3               | 4               | 2               |                 |
| 9    | 0     | 1            | 2   | 6        | 2                    | 2                    | 2                    | 2                    | 1                    | 3                | 4                | 4                | 4                | 2                | 2                | 4                | 4                | 2                | 3                 | 2                 | 3                 | 2                 | 3                 | 5               | 3               | 4               |                 |
| 10   | 0     | 1            | 1   | 8        | 2                    | 2                    | 2                    | 2                    | 1                    | 2                | 3                | 4                | 4                | 2                | 3                | 4                | 4                | 2                | 2                 | 4                 | 4                 | 3                 | 4                 | 4               | 4               | 4               |                 |
| 11   | 0     | 1            | 2   | 8        | 2                    | 2                    | 1                    | 1                    | 2                    | 2                | 2                | 2                | 2                | 2                | 3                | 4                | 1                | 2                | 2                 | 3                 | 3                 | 1                 | 1                 | 5               | 5               | 5               |                 |
| 12   | 1     | 1            | 2   | 8        | 1                    | 2                    | 1                    | 1                    | 2                    | 2                | 1                | 3                | 2                | 1                | 3                | 4                | 1                | 2                | 2                 | 2                 | 3                 | 1                 | 1                 | 5               | 5               | 4               |                 |
| 13   | 0     | 1            | 1   | 8        | 1                    | 2                    | 1                    | 1                    | 1                    | 1                | 1                | 1                | 1                | 1                | 2                | 1                | 1                | 1                | 2                 | 2                 | 3                 | 2                 | 2                 | 4               | 2               | 3               |                 |
| 14   | 1     | 1            | 2   | 6        | 1                    | 1                    | 1                    | 1                    | 2                    | 1                | 2                | 2                | 1                | 1                | 2                | 1                | 2                | 2                | 3                 | 2                 | 2                 | 1                 | 3                 | 5               | 4               | 3               |                 |
| 15   | 0     | 1            | 1   | 7        | 2                    | 1                    | 1                    | 1                    | 1                    | 1                | 1                | 1                | 1                | 1                | 3                | 2                | 2                | 1                | 1                 | 2                 | 2                 | 1                 | 4                 | 5               | 3               | 3               |                 |
| 16   | 0     | 1            | 1   | 7        | 2                    | 1                    | 1                    | 1                    | 2                    | 1                | 2                | 4                | 3                | 1                | 1                | 4                | 3                | 1                | 1                 | 1                 | 1                 | 1                 | 5                 | 5               | 5               | 3               |                 |
| 17   | 1     | 1            | 1   | 10       | 1                    | 1                    | 2                    | 1                    | 1                    | 1                | 2                | 2                | 1                | 1                | 1                | 4                | 1                | 1                | 1                 | 1                 | 1                 | 1                 | 1                 | 5               | 5               | 3               |                 |
| 18   | 1     | 1            | 2   | 6        | 1                    | 2                    | 1                    | 1                    | 1                    | 2                | 2                | 2                | 1                | 1                | 2                | 2                | 2                | 1                | 1                 | 3                 | 1                 | 1                 | 1                 | 5               | 5               | 4               |                 |
| 19   | 0     | 1            | 2   | 6        | 2                    | 2                    | 2                    | 2                    | 1                    | 2                | 2                | 2                | 2                | 2                | 2                | 3                | 3                | 3                | 3                 | 1                 | 2                 | 1                 | 1                 | 5               | 5               | 4               |                 |
| 20   | 1     | 1            | 2   | 7        | 2                    | 2                    | 2                    | 2                    | 1                    | 2                | 4                | 4                | 4                | 3                | 4                | 5                | 3                | 3                | 4                 | 4                 | 4                 | 2                 | 2                 | 4               | 4               | 3               |                 |
| 21   | 0     | 1            | 1   | 10       | 1                    | 1                    | 1                    | 1                    | 1                    | 3                | 2                | 2                | 2                | 3                | 2                | 3                | 2                | 2                | 2                 | 3                 | 3                 | 2                 | 2                 | 5               | 3               | 4               |                 |
| 22   | 0     | 1            | 2   | 9        | 2                    | 2                    | 2                    | 1                    | 1                    | 2                | 3                | 1                | 4                | 3                | 3                | 4                | 1                | 3                | 3                 | 3                 | 2                 | 2                 | 4                 | 4               | 4               | 3               |                 |
| 23   | 0     | 1            | 2   | 10       | 2                    | 2                    | 1                    | 2                    | 2                    | 3                | 3                | 3                | 2                | 2                | 4                | 4                | 1                | 3                | 4                 | 4                 | 4                 | 1                 | 5                 | 4               | 4               | 4               |                 |
| 24   | 0     | 1            | 1   | 9        | 1                    | 1                    | 1                    | 2                    | 1                    | 1                | 2                | 1                | 1                | 1                | 2                | 3                | 2                | 2                | 3                 | 2                 | 3                 | 2                 | 2                 | 4               | 3               | 2               |                 |
| 25   | 0     | 1            | 1   | 7        | 2                    | 1                    | 1                    | 1                    | 1                    | 1                | 1                | 1                | 1                | 1                | 1                | 4                | 1                | 1                | 2                 | 2                 | 3                 | 3                 | 3                 | 4               | 3               | 2               |                 |
| 26   | 0     | 1            | 2   | 8        | 2                    | 1                    | 2                    | 1                    | 1                    | 2                | 2                | 2                | 2                | 2                | 2                | 2                | 2                | 2                | 2                 | 2                 | 2                 | 3                 | 3                 | 4               | 3               | 2               |                 |
| 27   | 0     | 1            | 2   | 8        | 2                    | 2                    | 3                    | 1                    | 2                    | 2                | 3                | 2                | 2                | 2                | 4                | 5                | 3                | 2                | 2                 | 2                 | 1                 | 2                 | 4                 | 3               | 3               | 2               |                 |
| 28   | 0     | 1            | 1   | 9        | 2                    | 1                    | 1                    | 1                    | 1                    | 4                | 2                | 2                | 2                | 2                | 2                | 3                | 4                | 2                | 2                 | 4                 | 4                 | 1                 | 4                 | 5               | 4               | 4               |                 |
| 29   | 1     | 1            | 2   | 8        | 2                    | 1                    | 1                    | 1                    | 1                    | 2                | 1                | 1                | 1                | 1                | 2                | 1                | 1                | 1                | 2                 | 1                 | 2                 | 3                 | 4                 | 1               | 3               | 4               |                 |
| 30   | 0     | 1            | 2   | 5        | 1                    | 1                    | 1                    | 1                    | 1                    | 2                | 2                | 2                | 2                | 2                | 2                | 2                | 2                | 2                | 3                 | 2                 | 2                 | 2                 | 3                 | 5               | 4               | 3               |                 |
| 31   | 1     | 1            | 2   | 9        | 2                    | 1                    | 1                    | 1                    | 1                    | 1                | 1                | 1                | 1                | 1                | 1                | 1                | 1                | 1                | 1                 | 1                 | 1                 | 1                 | 5                 | 3               | 3               | 3               |                 |
| 32   | 0     | 1            | 2   | 8        | 1                    | 1                    | 1                    | 1                    | 1                    | 3                | 3                | 4                | 3                | 3                | 3                | 4                | 3                | 3                | 4                 | 3                 | 4                 | 2                 | 4                 | 4               | 3               | 3               |                 |
| 33   | 0     | 1            | 1   | 7        | 1                    | 1                    | 1                    | 1                    | 1                    | 1                | 1                | 1                | 1                | 1                | 1                | 1                | 1                | 1                | 1                 | 1                 | 1                 | 1                 | 5                 | 5               | 4               | 4               |                 |
| 34   | 0     | 1            | 2   | 9        | 2                    | 2                    | 2                    | 2                    | 1                    | 1                | 3                | 5                | 5                | 4                | 5                | 5                | 4                | 4                | 3                 | 3                 | 4                 | 3                 | 4                 | 5               | 4               | 5               |                 |
| 35   | 0     | 1            | 1   | 6        | 2                    | 1                    | 1                    | 1                    | 1                    | 3                | 2                | 2                | 2                | 2                | 3                | 2                | 2                | 1                | 1                 | 4                 | 4                 | 3                 | 4                 | 5               | 4               | 3               |                 |
| 36   | 0     | 1            | 2   | 8        | 1                    | 1                    | 1                    | 1                    | 1                    | 3                | 2                | 2                | 1                | 3                | 2                | 1                | 3                | 1                | 1                 | 3                 | 1                 | 1                 | 5                 | 3               | 2               | 4               |                 |
| 37   | 1     | 1            | 2   | 7        | 1                    | 1                    | 1                    | 1                    | 1                    | 2                | 2                | 2                | 1                | 1                | 2                | 2                | 2                | 1                | 1                 | 2                 | 2                 | 1                 | 2                 | 3               | 2               | 2               |                 |
| 38   | 0     | 1            | 2   | 8        | 1                    | 1                    | 1                    | 1                    | 1                    | 2                | 1                | 1                | 1                | 1                | 1                | 1                | 1                | 1                | 1                 | 1                 | 1                 | 2                 | 3                 | 1               | 3               | 3               |                 |
| 39   | 1     | 1            | 1   | 7        | 2                    | 1                    | 1                    | 1                    | 1                    | 1                | 1                | 1                | 1                | 1                | 1                | 1                | 1                | 1                | 2                 | 1                 | 1                 | 1                 | 3                 | 3               | 3               | 2               |                 |
| 40   | 0     | 1            | 1   | 10       | 2                    | 2                    | 2                    | 1                    | 2                    | 3                | 4                | 3                | 3                | 4                | 2                | 2                | 2                | 2                | 2                 | 3                 | 3                 | 1                 | 3                 | 5               | 5               | 4               |                 |
| 41   | 0     | 1            | 1   | 7        | 2                    | 1                    | 1                    | 1                    | 1                    | 1                | 1                | 1                | 1                | 1                | 1                | 1                | 1                | 1                | 1                 | 1                 | 1                 | 1                 | 4                 | 3               | 3               | 3               |                 |
| 42   | 0     | 1            | 2   | 7        | 2                    | 2                    | 2                    | 1                    | 2                    | 2                | 2                | 2                | 2                | 2                | 2                | 2                | 2                | 2                | 2                 | 2                 | 2                 | 3                 | 2                 | 4               | 3               | 2               |                 |
| 43   | 0     | 1            | 2   | 8        | 1                    | 2                    | 2                    | 1                    | 1                    | 3                | 4                | 3                | 3                | 2                | 2                | 4                | 3                | 2                | 2                 | 3                 | 2                 | 2                 | 2                 | 3               | 3               | 2               |                 |
| 44   | 0     | 1            | 1   | 8        | 2                    | 1                    | 1                    | 1                    | 1                    | 3                | 4                | 4                | 2                | 3                | 2                | 4                | 3                | 3                | 4                 | 4                 | 3                 | 3                 | 2                 | 4               | 5               | 5               |                 |
| 45   | 0     | 1            | 1   | 8        | 2                    | 1                    | 1                    | 2                    | 2                    | 3                | 1                | 4                | 4                | 4                | 3                | 1                | 4                | 3                | 1                 | 4                 | 1                 | 4                 | 4                 | 3               | 4               | 3               |                 |
| 46   | 0     | 1            | 1   | 7        | 1                    | 1                    | 1                    | 1                    | 1                    | 1                | 1                | 1                | 1                | 1                | 1                | 1                | 1                | 1                | 1                 | 1                 | 1                 | 1                 | 3                 | 5               | 5               | 5               |                 |
| 47   | 0     | 1            | 1   | 6        | 2                    | 1                    | 1                    | 1                    | 1                    | 1                | 3                | 3                | 1                | 3                | 1                | 1                | 1                | 1                | 3                 | 2                 | 2                 | 1                 | 4                 | 5               | 4               | 4               |                 |
| 48   | 0     | 1            | 1   | 7        | 2                    | 1                    | 1                    | 1                    | 1                    | 1                | 1                | 1                | 1                | 1                | 1                | 1                | 1                | 1                | 1                 | 1                 | 1                 | 1                 | 4                 | 5               | 4               | 1               |                 |
| 49   | 1     | 1            | 1   | 9        | 1                    | 1                    | 1                    | 1                    | 1                    | 1                | 1                | 1                | 1                | 1                | 1                | 1                | 1                | 1                | 1                 | 1                 | 1                 | 1                 | 3                 | 4               | 4               | 3               |                 |
| 50   | 0     | 1            | 1   | 7        | 2                    | 1                    | 1                    | 1                    | 1                    | 2                | 2                | 1                | 1                | 1                | 2                | 2                | 1                | 1                | 2                 | 2                 | 2                 | 3                 | 1                 | 4               | 5               | 4               |                 |
| 51   | 1     | 1            | 1   | 8        | 2                    | 1                    | 1                    | 1                    | 1                    | 2                | 2                | 2                | 2                | 2                | 2                | 2                | 2                | 2                | 2                 | 2                 | 2                 | 2                 | 2                 | 3               | 3               | 3               |                 |
| 52   | 0     | 1            | 2   | 8        | 1                    | 1                    | 1                    | 1                    | 1                    | 2                | 2                | 2                | 2                | 2                | 2                | 2                | 2                | 2                | 2                 | 2                 | 2                 | 1                 | 4                 | 2               | 3               | 3               |                 |
| 53   | 1     | 1            | 1   | 7        | 1                    | 1                    | 1                    | 1                    | 1                    | 2                | 2                | 2                | 2                | 2                | 2                | 2                | 2                | 2                | 2                 | 2                 | 2                 | 1                 | 2                 | 5               | 5               | 4               |                 |
| 54   | 0     | 1            | 1   | 8        | 2                    | 1                    | 1                    | 1                    | 1                    | 2                | 1                | 1                | 1                | 1                | 1                | 1                | 1                | 1                | 1                 | 1                 | 1                 | 1                 | 3                 | 3               | 3               | 3               |                 |
| 55   | 0     | 1            | 1   | 7        | 1                    | 1                    | 1                    | 1                    | 1                    | 1                | 1                | 1                | 1                | 1                | 1                | 1                | 1                | 1                | 1                 | 1                 | 1                 | 1                 | 2                 | 2               | 2               | 2               |                 |
| 56   | 0     | 1            | 1   | 8        | 2                    | 1                    | 1                    | 1                    | 1                    | 1                | 1                | 1                | 1                | 1                | 1                | 1                | 1                | 1                | 1                 | 1                 | 1                 | 1                 | 5                 | 4               | 3               | 3               |                 |
| 57   | 0     | 1            | 2   | 10       | 1                    | 1                    | 1                    | 1                    | 1                    | 3                | 2                | 2                | 1                | 3                | 2                | 3                | 2                | 2                | 2                 | 3                 | 3                 | 1                 | 5                 | 3               | 4               | 4               |                 |
| 58   | 0     | 1            | 2   | 7        | 2                    | 2                    | 2                    | 1                    | 2                    | 4                | 4                | 4                | 4                | 4                | 4                | 4                | 4                | 4                | 4                 | 4                 | 4                 | 2                 | 4                 | 5               | 5               | 4               |                 |
| 59   | 0     | 1            | 2   | 8        | 2                    | 2                    | 2                    | 2                    | 2                    | 4                | 4                | 4                | 4                | 4                | 4                | 4                | 4                | 4                | 4                 | 4                 | 4                 | 2                 | 4                 | 4               | 3               | 4               |                 |
| 60   | 1     | 1            | 2   | 8        | 2                    | 2                    | 2                    | 2                    | 2                    | 1                | 4                | 4                | 4                | 4                | 4                | 4                | 4                | 4                | 4                 | 4                 | 4                 | 3                 | 3                 | 4               | 4               | 4               |                 |
| 61   | 0     | 1            | 2   | 7        | 2                    | 2                    | 2                    | 1                    | 1                    | 2                | 3                | 4                | 4                | 4                | 4                | 4                | 4                | 4                | 4                 | 4                 | 4                 | 2                 | 4                 | 4               | 4               | 3               |                 |
| 62   | 0     | 1            | 1   | 5        | 1                    | 2                    | 2                    | 1                    | 2                    | 2                | 2                | 2                | 2                | 2                | 2                | 2                | 2                | 2                | 2                 | 2                 | 2                 | 1                 | 5                 | 4               | 4               | 3               |                 |
| 63   | 0     | 1            | 2   | 8        | 2                    | 2                    | 2                    | 1                    | 2                    | 5                | 5                | 5                | 5                | 5                | 5                | 5                | 4                | 4                | 5                 | 5                 | 5                 | 5                 | 5                 | 5               | 5               | 5               |                 |
| 64   | 1     | 1            | 2   | 9        | 2                    | 1                    | 1                    | 1                    | 1                    | 3                | 3                | 3                | 3                | 3                | 3                | 3                | 3                | 3                | 3                 | 3                 | 3                 | 3                 | 3                 | 3               | 3               | 4               |                 |
| 65   | 0     | 1            | 1   | 10       | 2                    | 2                    | 2                    | 1                    | 2                    | 4                | 4                | 4                | 4                | 4                | 4                | 4                | 4                | 4                | 4                 | 4                 | 4                 | 2                 | 4                 | 4               | 3               | 3               |                 |
| 66   | 1     | 1            | 1   | 9        | 2                    | 1                    | 1                    | 2                    | 2                    | 3                | 2                | 2                | 2                | 2                | 2                | 2                | 2                | 2                | 2                 | 2                 | 2                 | 2                 | 3                 | 5               | 4               | 4               |                 |
| 67   | 0     | 1            | 1   | 7        | 2                    | 2                    | 2                    | 1                    | 1                    | 2                | 4                | 2                | 2                | 2                | 2                | 2                | 2                | 2                | 2                 | 2                 | 2                 | 2                 | 4                 | 4               | 4               | 4               |                 |
| 68   | 0     | 1            | 1   | 8        | 1                    | 1                    | 1                    | 1                    | 1                    | 1                | 1                | 1                | 1                | 1                | 1                | 1                | 1                | 1                | 1                 | 1                 | 1                 | 1                 | 4                 | 4               | 4               | 3               |                 |
| 69   | 0     | 1            | 1   | 7        | 2                    | 1                    | 1                    | 1                    | 1                    | 2                | 1                | 1                | 1                | 1                | 1                | 1                | 1                | 1                | 1                 | 1                 | 1                 | 1                 | 3                 | 5               | 4               | 3               |                 |
| 70   | 1     | 1            | 1   | 7        | 2                    | 1                    | 1                    | 1                    | 1                    | 3                | 1                | 1                | 1                | 1                | 1                | 1                | 1                | 1                | 1                 | 1                 | 1                 | 1                 | 4                 | 4               | 3               | 3               |                 |
| 71   | 1     | 1            | 1   | 7        | 1                    | 1                    | 1                    | 1                    | 1                    | 1                | 2                | 3                | 1                | 2                | 3                | 1                | 2                | 3                | 1                 | 3                 | 1                 | 4                 | 3                 | 3               | 3               | 3               |                 |
| 72   | 0     | 1            | 1   | 7        | 2                    | 1                    | 1                    | 1                    | 1                    | 4                |                  |                  |                  |                  |                  |                  |                  |                  |                   |                   |                   |                   |                   |                 |                 |                 |                 |

|    |   |   |   |    |     |     |     |     |     |     |     |     |     |     |     |     |     |     |     |     |     |     |     |     |     |     |     |
|----|---|---|---|----|-----|-----|-----|-----|-----|-----|-----|-----|-----|-----|-----|-----|-----|-----|-----|-----|-----|-----|-----|-----|-----|-----|-----|
| 52 | 0 | 2 | 2 | 8  | 2   | 1   | 1   | 1   | 1   | 4   | 5   | 4   | 4   | 4   | 5   | 4   | 3   | 3   | 4   | 4   | 4   | 4   | 4   | 4   | 4   | 3   | 3   |
| 53 | 1 | 2 | 1 | 7  | -99 | -99 | -99 | -99 | -99 | -99 | -99 | -99 | -99 | -99 | -99 | -99 | -99 | -99 | -99 | -99 | -99 | -99 | -99 | -99 | -99 | -99 | -99 |
| 54 | 0 | 2 | 1 | 8  | 2   | 1   | 1   | 1   | 1   | 5   | 5   | 5   | 4   | 5   | 5   | 4   | 5   | 5   | 5   | 5   | 5   | 4   | 4   | 5   | 5   | 4   | 2   |
| 55 | 0 | 2 | 1 | 7  | 1   | 1   | 1   | 1   | 1   | 4   | 4   | 5   | 4   | 4   | 5   | 4   | 4   | 4   | 4   | 4   | 4   | 4   | 4   | 4   | 5   | 5   | 5   |
| 56 | 0 | 2 | 1 | 8  | 1   | 1   | 1   | 1   | 1   | 5   | 3   | 4   | 4   | 4   | 5   | 4   | 4   | 4   | 4   | 4   | 4   | 4   | 4   | 4   | 5   | 3   | 3   |
| 57 | 0 | 2 | 2 | 10 | 2   | 1   | 1   | 1   | 1   | 4   | 4   | 4   | 4   | 3   | 4   | 4   | 4   | 4   | 4   | 4   | 4   | 4   | 4   | 5   | 5   | 4   | 4   |
| 58 | 0 | 2 | 2 | 7  | 2   | 2   | 2   | 2   | 2   | 5   | 5   | 5   | 5   | 5   | 5   | 5   | 5   | 5   | 5   | 5   | 5   | 4   | 4   | 5   | 5   | 5   | 5   |
| 59 | 0 | 2 | 2 | 8  | 2   | 2   | 2   | 2   | 2   | 4   | 5   | 5   | 5   | 5   | 5   | 5   | 5   | 5   | 5   | 5   | 5   | 4   | 4   | 5   | 5   | 5   | 5   |
| 60 | 1 | 2 | 2 | 8  | -99 | -99 | -99 | -99 | -99 | -99 | -99 | -99 | -99 | -99 | -99 | -99 | -99 | -99 | -99 | -99 | -99 | -99 | -99 | -99 | -99 | -99 | -99 |
| 61 | 0 | 2 | 2 | 7  | 2   | 2   | 2   | 2   | 2   | 5   | 4   | 4   | 4   | 4   | 4   | 4   | 4   | 4   | 4   | 4   | 4   | 4   | 4   | 3   | 3   | 5   | 5   |
| 62 | 0 | 2 | 1 | 5  | 1   | 2   | 2   | 1   | 1   | 5   | 4   | 5   | 4   | 5   | 5   | 4   | 4   | 4   | 4   | 2   | 5   | 4   | 4   | 5   | 4   | 4   | 3   |
| 63 | 0 | 2 | 2 | 8  | 2   | 2   | 2   | 2   | 2   | 5   | 5   | 5   | 5   | 5   | 5   | 4   | 4   | 4   | 4   | 5   | 5   | 4   | 4   | 5   | 5   | 5   | 5   |
| 64 | 0 | 2 | 2 | 9  | 1   | 1   | 1   | 1   | 1   | 5   | 4   | 4   | 4   | 4   | 4   | 4   | 4   | 4   | 4   | 4   | 4   | 4   | 4   | 4   | 5   | 4   | 4   |
| 65 | 0 | 2 | 1 | 10 | 1   | 2   | 2   | 1   | 1   | 4   | 5   | 4   | 4   | 5   | 4   | 4   | 4   | 4   | 4   | 4   | 4   | 4   | 4   | 4   | 5   | 3   | 3   |
| 66 | 1 | 2 | 1 | 9  | -99 | -99 | -99 | -99 | -99 | -99 | -99 | -99 | -99 | -99 | -99 | -99 | -99 | -99 | -99 | -99 | -99 | -99 | -99 | -99 | -99 | -99 | -99 |
| 67 | 0 | 2 | 1 | 7  | 2   | 2   | 2   | 2   | 2   | 5   | 5   | 4   | 3   | 3   | 5   | 4   | 2   | 3   | 4   | 4   | 3   | 4   | 4   | 5   | 5   | 5   | 4   |
| 68 | 0 | 2 | 1 | 8  | 1   | 1   | 1   | 1   | 1   | 4   | 4   | 4   | 3   | 3   | 4   | 4   | 3   | 3   | 4   | 4   | 4   | 4   | 4   | 4   | 3   | 3   | 3   |
| 69 | 0 | 2 | 1 | 7  | 1   | 1   | 1   | 1   | 1   | 4   | 4   | 4   | 4   | 4   | 4   | 4   | 4   | 4   | 4   | 4   | 4   | 4   | 3   | 4   | 4   | 4   | 4   |
| 70 | 1 | 2 | 1 | 7  | -99 | -99 | -99 | -99 | -99 | -99 | -99 | -99 | -99 | -99 | -99 | -99 | -99 | -99 | -99 | -99 | -99 | -99 | -99 | -99 | -99 | -99 | -99 |
| 71 | 1 | 2 | 1 | 7  | -99 | -99 | -99 | -99 | -99 | -99 | -99 | -99 | -99 | -99 | -99 | -99 | -99 | -99 | -99 | -99 | -99 | -99 | -99 | -99 | -99 | -99 | -99 |
| 72 | 0 | 2 | 1 | 7  | 1   | 1   | 2   | 1   | 1   | 4   | 4   | 4   | 5   | 4   | 4   | 3   | 3   | 3   | 4   | 4   | 4   | 4   | 4   | 5   | 4   | 4   | 3   |
| 73 | 0 | 2 | 1 | 7  | 1   | 1   | 1   | 1   | 1   | 4   | 4   | 4   | 4   | 4   | 3   | 5   | 4   | 3   | 4   | 4   | 4   | 4   | 4   | 5   | 5   | 5   | 5   |
| 74 | 1 | 2 | 2 | 7  | -99 | -99 | -99 | -99 | -99 | -99 | -99 | -99 | -99 | -99 | -99 | -99 | -99 | -99 | -99 | -99 | -99 | -99 | -99 | -99 | -99 | -99 | -99 |
| 75 | 0 | 2 | 2 | 7  | 1   | 1   | 1   | 1   | 1   | 4   | 4   | 4   | 4   | 4   | 4   | 2   | 3   | 4   | 4   | 4   | 4   | 4   | 4   | 5   | 4   | 4   | 3   |
| 76 | 0 | 2 | 2 | 9  | 1   | 2   | 2   | 1   | 1   | 5   | 5   | 4   | 4   | 5   | 5   | 5   | 5   | 5   | 4   | 4   | 4   | 4   | 4   | 5   | 5   | 5   | 4   |
| 77 | 0 | 2 | 1 | 9  | 1   | 1   | 1   | 1   | 1   | 4   | 4   | 5   | 4   | 5   | 5   | 4   | 4   | 4   | 4   | 4   | 4   | 3   | 4   | 5   | 4   | 4   | 3   |
| 78 | 0 | 2 | 1 | 7  | 2   | 1   | 1   | 1   | 2   | 4   | 4   | 4   | 3   | 4   | 4   | 3   | 5   | 4   | 4   | 4   | 3   | 4   | 4   | 5   | 5   | 3   | 3   |
| 79 | 0 | 2 | 2 | 7  | 2   | 2   | 1   | 1   | 1   | 4   | 4   | 4   | 4   | 4   | 4   | 4   | 3   | 4   | 4   | 4   | 4   | 4   | 4   | 5   | 4   | 4   | 3   |
| 80 | 0 | 2 | 1 | 8  | 2   | 1   | 1   | 1   | 1   | 4   | 4   | 4   | 4   | 4   | 4   | 4   | 4   | 4   | 4   | 4   | 4   | 4   | 4   | 5   | 5   | 3   | 4   |
| 81 | 0 | 2 | 1 | 9  | 2   | 2   | 2   | 2   | 2   | 4   | 4   | 5   | 4   | 4   | 5   | 5   | 4   | 4   | 4   | 4   | 4   | 4   | 4   | 5   | 4   | 4   | 3   |
| 82 | 0 | 2 | 1 | 8  | 1   | 1   | 1   | 1   | 1   | 4   | 5   | 4   | 3   | 3   | 5   | 4   | 4   | 4   | 5   | 4   | 4   | 4   | 4   | 4   | 5   | 3   | 2   |
