# Supplementary material
Source: PubMed Central journal article supplement (PMC8662900)
Supplement: 12909_2021_3043_MOESM3_ESM.pdf [file 12909_2021_3043_MOESM3_ESM.pdf]

# Vorschau

## Pre-Test

Datum: 14. Apr 2021, 21:14 Maximale Punktezahl: 30

### Frage 1 - Naturkatastrophen (1 Punkt)

Die häufigsten Naturkatastrophen im letzten Jahrzehnt waren:

Bitte wählen Sie maximal 1 von 4 Antworten!

- Überschwemmungen
- Stürme
- Erdbeben
- Hitzewellen

### Frage 2 - Man-Made Katastrophen (1 Punkt)

Zu Man-Made Katastrophen zählen:

Bitte wählen Sie maximal 1 von 4 Antworten!

- Dürren
- Kriege
- Hitzewellen
- Schädlingsbefall

### Frage 3 - MANV Stufe (1 Punkt)

Was trifft auf MANV Stufe 3 zu?

Bitte wählen Sie maximal 1 von 4 Antworten!

- Definitionsgemäß maximal 11-25 Verletzte
- Ist gekennzeichnet durch eine wesentliche Zerstörung der örtlichen Infrastruktur
- Ist mit Kräften des Regelrettungsdienstes problemlos zu bewältigen
- Beinhaltet den Einsatz von ehrenamtlichen Rettungskräften neben Kräften des Regelrettungsdienstes

### Frage 4 - Aufgaben LNA (1 Punkt)

Zu den Aufgaben des Leitenden Notarztes zählen **nicht:**

Bitte wählen Sie maximal 1 von 4 Antworten!

- Die direkte medizinische Patientenversorgung
- Die Beurteilung der Lage aus medizinischer Sicht
- Die Festlegung von Behandlungs- und Transportprioritäten
- Weisungsbefugnis gegenüber allen medizinischen Mitarbeitern

### Frage 5 - Größere Schadenlagen (1 Punkt)

Bei größeren Schadenslagen ist es wichtig:

Bitte wählen Sie maximal 1 von 4 Antworten!

- Alle Patienten so schnell wie möglich in das nächste Krankenhaus zu verbringen
- Transportkapazitäten voll auszunutzen und Leicht- wie Schwerverletzte gleichzeitig zu transportieren
- Eine Verteilung der Patienten in verschiedene geeignete Krankenhäuser zu sichern
- Eine genaue Erfassung der Patientendaten und Transportziele ist aufgrund des Zeitaufwands nicht notwendig

### Frage 6 - Ankunft, Analyse und Lagemeldung (1 Punkt)

Zur Ankunft, Analyse und Lagemeldung gehört **nicht**

Bitte wählen Sie maximal 1 von 5 Antworten!

- Briefing durch den Gesamteinsatzleiter (Polizei/Feuerwehr, etc.) vor Ort
- Die Erfassung der Windrichtung
- Die Erfassung der möglichen Zu- und Abfahrtsrouten
- Die Beurteilung der Örtlichkeiten zum Einrichten möglicher Behandlungsplätze
- Die exakte Triage aller Betroffenen

### Frage 7 - Verletztes Teammitglied (1 Punkt)

Welche Aussage trifft **nicht** zu? Bei Verletzung eines Teammitglieds:

Bitte wählen Sie maximal 1 von 4 Antworten!

- Hat es keine Auswirkungen auf das Rettungsteam
- Können die Betroffenen ggf. nicht mehr richtig versorgt werden
- Ist der gesamte Einsatz / Mission gefährdet
- Nimmt ggf. die komplette Organisation Schaden

### Frage 8 - Funken (1 Punkt)

Welche Aussage trifft **nicht** zu? Beim Funken ist es wichtig auf folgendes zu achten:

Bitte wählen Sie maximal 1 von 4 Antworten!

- Laufende Gespräche nicht unterbrechen
- Komplizierte Worte zu buchstabieren
- Es wird immer zuerst der Sendende Gesprächsteilnehmer genannt
- Sollte der Gesprächspartner nicht antworten, wird der Anruf 3x wiederholt und dann blind abgesetzt

### Frage 9 - Triage Algorithmus (1 Punkt)

Welche Aussage zum START/mSTART-Algorithmus trifft **nicht** zu?

Bitte wählen Sie maximal 1 von 4 Antworten!

- Das START Triage-System ist das am häufigsten im zivilen verwendete Triage-System
- Die Bedeutung ist Simple Triage And Rapid Treatment
- Die einzige Behandlung, die während der Triage erlaubt ist, ist die Reanimation
- Falls der Betroffene keine Spontanatmung zeigt, sollten die Atemwege freigemacht und der Kopf rekliniert werden

### Frage 10 - Sichtung (1 Punkt)

Welche Aussage zur Sichtung trifft **nicht** zu?

Bitte wählen Sie maximal 1 von 4 Antworten!

- Sind Kinder in derselben Sichtungskategorie wie Erwachsene, werden diese vor den Erwachsenen behandelt.
- Kinder sind automatisch in eine dringendere Sichtungskategorie als Erwachsene einzuordnen
- Im jumpSTART Algorithmus sind 5 initiale Beatmungen bei fehlender Spontanatmung und tastbaren Pulsen notwendig
- Der neurologische Status kann bei Kindern über das AVPU-Schema bewertet werden

### Frage 11 - Dekontamination (1 Punkt)

Dekontamination...

Bitte wählen Sie maximal 1 von 4 Antworten!

- findet ausschließlich am Schadensort statt
- ist in den umliegenden Kliniken nicht notwendig
- sollte auch in Zielkliniken durchgeführt werden können

- wird zum größten Teil nicht durch die Entkleidung der Betroffenen erreicht

## Frage 12 - CBRN (1 Punkt)

Im Fall einer möglichen Kontamination mit CBRN-Stoffen gilt **nicht**

Bitte wählen Sie maximal 1 von 4 Antworten!

- Die grüne Zone muss mit einem Abstand von mindestens 200m festgelegt werden
- Die rote Zone stellt die Gefahrenzone, ggf. mit Explosionsgefahr, dar
- Betroffene (ggf. kontaminierte Patienten) verbleiben bis zur sicheren Dekontamination in der gelben Zone
- Lebensgefährlich verletzte Patienten werden, unabhängig von einer möglichen Kontamination, sofort nach Ankunft des Rettungsdienstes behandelt.

## Frage 13 - Stress (1 Punkt)

Welche Aussage trifft zu?

Bitte wählen Sie maximal 1 von 5 Antworten!

- In einer Katastrophensituation gibt es nur wenige Stressoren, welche einen psychologischen Support indizieren könnten.
- Stressreaktionen gibt es nur auf körperlicher Ebene.
- Einsatzbewältigung kann erst nach einem Einsatz stattfinden.
- Während des Einsatzes sind keine Pausen aus Gründen der Einsatzbewältigung möglich.
- Gespräche zur Einsatz- und Notfallnachsorge sind auf freiwilliger Basis.

## Frage 14 - Kapazitätserweiterung (1 Punkt)

Welche Aussage trifft für die Kapazitätserweiterung bei der Klinischen Versorgung im Katastrophenfall **nicht** zu?

Bitte wählen Sie maximal 1 von 4 Antworten!

- Schaffung zusätzlicher Intensivbehandlungsplätze in Aufwacheinheiten/ Intermediate-Care-Bereichen
- Freimachen von regulären Intensivbehandlungsbetten durch Verlegung auf Normalstationen oder andere Krankenhäuser
- Schaffung zusätzlicher OP-Kapazitäten in Notaufnahmen/Schockräumen / Behandlungsräumen
- Rekrutierung der REA-Teams der Intensivstationen für die Versorgung der Betroffenen

## Frage 15 - Interne Lage (1 Punkt)

Was gehört **nicht** zu einer internen Katastrophenlage in einer Klinik?

Bitte wählen Sie maximal 1 von 5 Antworten!

- Bombendrohung
- Ausfall der materiellen Logistik
- Massenkarambolage
- Brand
- Freiwerden von Gasen

## Frage 16 - ten priorities (1 Punkt)

Zu den „ten priorities after disasters“ zählt **nicht:**

Bitte wählen Sie maximal 1 von 4 Antworten!

- Zelte und Notunterkünfte
- Medizinische Versorgung
- Kontrolle von Epidemien
- Mediale Aufmerksamkeit

## Frage 17 - Lage Flüchtlingscamps (1 Punkt)

Kriterium für die Auswahl einer optimalen Fläche für ein Flüchtlingscamp ist **nicht:**

Bitte wählen Sie maximal 1 von 4 Antworten!

- Die Sicherheit in der Umgebung
- Die Lage auf einem Hügel
- Der Zugang zu sauberem Wasser
- Eine gute Erreichbarkeit

## Frage 18 - Verantwortung zur Hilfeleistung (1 Punkt)

Die Verantwortung zur Hilfeleistung nach einer nationalen Katastrophe hat an erster Stelle:

Bitte wählen Sie maximal 1 von 4 Antworten!

- Der jeweilige Staat in welchem die Katastrophe stattfindet
- Die Vereinten Nationen
- UN-OCHA
-

## Frage 19 - Humanitäre Prinzipien (1 Punkt)

Zu den Humanitären Prinzipien zählt:

Bitte wählen Sie maximal 1 von 5 Antworten!

- Humanität
- Neutralität
- Unparteilichkeit
- Unabhängigkeit
- Alles von A-D richtig

## Frage 20 - Sphere (1 Punkt)

Was trifft **nicht** zu? Das Sphere Book...

Bitte wählen Sie maximal 1 von 4 Antworten!

- Folgt der Philosophie, dass jeder Mensch das Recht hat in Würde zu leben
- Ist verpflichtend für alle Hilfsorganisationen
- Wurde nach dem Genozid in Ruanda ins Leben gerufen
- Wird von einem Zusammenschluss der wichtigsten Hilfsorganisationen herausgegeben

## Frage 21 - Patient 1 (1 Punkt)

**Sichten Sie den folgenden Patienten mit dem START Algorithmus**

**Rot: Lebensgefährlich verletzt**

**Gelb: Schwerverletzt**

**Grün: Leichtverletzt**

**Schwarz: Verstorben/momentan nicht behandelbar**

30 Jahre männlich

Kopfplatzwunde

Ansprechbar, Verwirrt, folgt Aufforderungen nicht

RR 160/90

HF 100

Normale Atmung

- Rot
- Gelb
- Grün
-

Schwarz

### Frage 22 - Patient 2 (1 Punkt)

**Sichten Sie den folgenden Patienten mit dem START Algorithmus**

**Rot: Lebensgefährlich verletzt**

**Gelb: Schwerverletzt**

**Grün: Leichtverletzt**

**Schwarz: Verstorben/momentan nicht behandelbar**

80 Jahre weiblich

Brustschmerz

Keine äußerlichen Verletzungen

RR 150/100

HF 120

AF 20/min

Zu schwach um Aufzustehen

Orientiert

Bitte wählen Sie maximal 1 von 4 Antworten!

- Rot
- Gelb
- Grün
- Schwarz

### Frage 23 - Patient 3 (1 Punkt)

**Sichten Sie den folgenden Patienten mit dem START Algorithmus**

**Rot: Lebensgefährlich verletzt**

**Gelb: Schwerverletzt**

**Grün: Leichtverletzt**

**Schwarz: Verstorben/momentan nicht behandelbar**

2 Jahre männlich

Schreit und weint

Gebrochener rechter Unterarm

AF 40/min

Kapillare Reperfusion (CRP) <2s

Läuft seiner Mutter hinterher

Bitte wählen Sie maximal 1 von 4 Antworten!

- Rot
- Gelb
-

Grün

Schwarz

### Frage 24 - Patient 4 (1 Punkt)

**Sichten Sie den folgenden Patienten mit dem START Algorithmus**

**Rot: Lebensgefährlich verletzt**

**Gelb: Schwerverletzt**

**Grün: Leichtverletzt**

**Schwarz: Verstorben/momentan nicht behandelbar**

55 Jahre männlich

Pat. Kommt wild gestikulierend mit blutenden oberflächlichen Schnittwunden an Armen und Beinen auf dich zu gerannt und ruft um Hilfe für eine Frau

Bitte wählen Sie maximal 1 von 4 Antworten!

Rot

Gelb

Grün

Schwarz

### Frage 25 - Patient 5 (1 Punkt)

**Sichten Sie den folgenden Patienten mit dem START Algorithmus**

**Rot: Lebensgefährlich verletzt**

**Gelb: Schwerverletzt**

**Grün: Leichtverletzt**

**Schwarz: Verstorben/momentan nicht behandelbar**

32 Jahre, weiblich

Schwanger, 30.SSW

Ansprechbar, sehr aufgeregt

Starke Schmerzen im Bauch

CPR 5 sec

AF 24min

Rot

Gelb

Grün

Schwarz

### Frage 26 - Patient 6 (1 Punkt)



**Sichten Sie die folgende Patientin mit dem START Algorithmus**

**Rot: Lebensgefährlich verletzt**

**Gelb: Schwerverletzt**

**Grün: Leichtverletzt**

**Schwarz: Verstorben/momentan nicht behandelbar**

50 Jahre, weiblich

blass, liegend

Keine Spontanatmung

Offene Thoraxverletzung

--> Nach Reklination Spontanatmung

--> AF 32

Bitte wählen Sie maximal 1 von 4 Antworten!

- Rot
- Gelb
- Grün
- Schwarz

---

Frage 27 - Patient 7 (1 Punkt)

**Sichten Sie die folgende Patientin mit dem START Algorithmus**

**Rot: Lebensgefährlich verletzt**

**Gelb: Schwerverletzt**

**Grün: Leichtverletzt**

**Schwarz: Verstorben/momentan nicht behandelbar**

20 Jahre männlich

Metallsplitter im Auge, sonst keine Verletzungen

CPR < 2sec

Spontanatmend und orientiert

Bitte wählen Sie maximal 1 von 4 Antworten!

- Rot
- Gelb
- Grün
- Schwarz

---

Frage 28 - Patient 8 (1 Punkt)

**Sichten Sie den folgenden Patienten mit dem START Algorithmus**

**Rot: Lebensgefährlich verletzt**

**Gelb: Schwerverletzt**

**Grün: Leichtverletzt**

**Schwarz: Verstorben/momentan nicht behandelbar**

45 Jahre männlich

Offen gebrochener Unterschenkel

Wach, orientiert

Spontanatmend

CPR < 2sec

Bitte wählen Sie maximal 1 von 4 Antworten!

- Rot
- Gelb
- Grün
- Schwarz

Frage 29 - Patient 9 (1 Punkt)

**Sichten Sie den folgenden Patienten mit dem START Algorithmus**

**Rot: Lebensgefährlich verletzt**

**Gelb: Schwerverletzt**

**Grün: Leichtverletzt**

**Schwarz: Verstorben/momentan nicht behandelbar**

35 Jahre männlich

Thoraxdurchspießung

Keine Spontanatmung

Nach Reklination keine Spontanatmung

Bitte wählen Sie maximal 1 von 4 Antworten!

- Rot
- Gelb
- Grün
- Schwarz

Frage 30 - Patient 10 (1 Punkt)

**Sichten Sie den folgenden Patienten mit dem START Algorithmus**

**Rot: Lebensgefährlich verletzt**

**Gelb: Schwerverletzt**

**Grün: Leichtverletzt**

**Schwarz: Verstorben/momentan nicht behandelbar**

15 Jahre weiblich

Hämatom linker Oberbauch

AF 50

Steht gekrümmt an einer Säule

Wach und orientiert

CPR 4 sec

Bitte wählen Sie maximal 1 von 4 Antworten!

- Rot
- Gelb
- Grün
- Schwarz

# Vorschau

## Post-Test

Datum: 14. Apr 2021, 21:16 Maximale Punktezahl: 30

### Frage 1 - Katastrophenkriterien (1 Punkt)

Welches Kriterium zählt nicht, um von den Vereinten Nationen als Katastrophe anerkannt zu werden

Bitte wählen Sie maximal 1 von 5 Antworten!

- 10 Menschen oder mehr sind bei einem Ereignis verstorben
- 100 Menschen oder mehr sind von einem Ereignis betroffen
- Erklärung des Katastrophenfalls der Regierung des Landes
- Das internationale Hilfsersuchen einer Regierung
- Das Hilfsersuchen eines einzelnen Betroffenen

### Frage 2 - Todesfälle Naturkatastrophen (1 Punkt)

Die meisten Todesfälle bei Naturkatastrophen im letzten Jahrzehnt gab es bei

Bitte wählen Sie maximal 1 von 4 Antworten!

- Erdbeben
- Stürmen
- Hitzewellen
- Dürren

### Frage 3 - Prognose (1 Punkt)

In der Katastrophenmedizin zählt folgende Prognose

Bitte wählen Sie maximal 1 von 2 Antworten!

- Individualprognose
- Gesamtprognose

### Frage 4 - Einsatzleitung (1 Punkt)

Wer hat bei größeren Schadenslagen mit Gefahrgut unterhalb der Katastrophenschwelle die Gesamteinsatzleitung vor Ort

Bitte wählen Sie maximal 1 von 5 Antworten!

- Derjenige, der am lautesten schreit
- Der Rettungsdienstleiter
- Der Landrat/Oberbürgermeister
- Der örtliche Einsatzleiter der Feuerwehr
- Leitender Notarzt und organisatorischer Leiter Rettungsdienst

### Frage 5 - OrgL (1 Punkt)

Welche Aussage trifft nicht zu: Der „OrgL“

Bitte wählen Sie maximal 1 von 4 Antworten!

- ist der Organisatorische Leiter Rettungsdienst
- ist vor allem für die technisch - organisatorische Beurteilung der medizinischen Lage verantwortlich
- ist in Baden-Württemberg mit einer pinken Weste gekennzeichnet
- ist für die Kommunikation mit der Leitstelle zuständig

### Frage 6 - METHANE Report (1 Punkt)

Der sogenannte METHANE Report gibt **keinen** Aufschluss über

Bitte wählen Sie maximal 1 von 4 Antworten!

- die erste Lageeinschätzung auf Sicht
- die ausführliche 2.Lagemeldung
- Zu- und Abfahrtswege
- die ungefähre Anzahl der Betroffenen

### Frage 7 - PHTLS (1 Punkt)

Beim PHTLS (Pre-Hospital-Trauma-Life-Support) ist die folgende Zuordnung falsch

Bitte wählen Sie maximal 1 von 5 Antworten!

- A Airway
- B Breathing
- C Circulation
- D Disaster
- E Environment

### Frage 8 - Katastropheneinsatz (1 Punkt)

Bei einem Katastropheneinsatz ist es das Wichtigste

Bitte wählen Sie maximal 1 von 4 Antworten!

- dem einzelnen Patienten zu helfen
- die Vorgaben der Hilfsorganisation zu erfüllen
- der Eigenschutz des Einsatzteams
- die mediale Wirkung auf das Ereignis zu lenken

### Frage 9 - Kommunikation (1 Punkt)

Welche Aussage zur Kommunikation am Einsatzort trifft zu?

Bitte wählen Sie maximal 1 von 4 Antworten!

- Mobiltelefone sind ausfallssicher und stehen auch in Katastrophenfällen jederzeit zur Verfügung
- Satellitentelefone sind flächendeckend verfügbar und überall auf der Welt ausfallssicher
- Bei größeren Schadenslagen werden regelhaft Feldtelefone (kabelgebunden) etabliert
- Am Einsatzort ist die Kommunikation über BOS-Funkgeräte (2m/4m/TETRA) üblich

### Frage 10 - START-Triage (1 Punkt)

Zu den Behandlungen, die während der START-Triage erlaubt sind, zählt **nicht**:

Bitte wählen Sie maximal 1 von 4 Antworten!

- Tracheotomie
- Stopp spritzender arterieller Blutungen
- Entlastung eines Spannungspneumothorax
- Öffnung der Atemwege

### Frage 11 - Blaue Sichtungskategorie (1 Punkt)

Die Blaue Sichtungskategorie

Bitte wählen Sie maximal 1 von 4 Antworten!

- Wurde in den USA erfunden
- Beschreibt Patienten mit sicheren Todeszeichen
- Beschreibt Patienten die noch am Leben sind, denen aber mit den vorhandenen Ressourcen nach Triage Algorithmus aktuell nicht geholfen werden kann
- Bedeutet eine sofortige Behandlung

## Frage 12 - Humanitäre Charta (1 Punkt)

Die Humanitäre Charta beinhaltet:

Bitte wählen Sie maximal 1 von 4 Antworten!

- Das Recht auf ein Leben in Würde
- Das Recht auf Humanitäre Hilfe
- Alle sind richtig
- Das Recht auf Schutz und Sicherheit

## Frage 13 - Schlüsselaspekte der Sichtung (1 Punkt)

Welche Aussage zu den Schlüsselaspekten der Sichtung trifft nicht zu?

Bitte wählen Sie maximal 1 von 4 Antworten!

- Triage soll die Gruppe derer identifizieren welche sofortige Hilfe benötigen und ist eine Determinante für das Überleben dieser lebensgefährlich Verletzten
- Triage soll die effektive Nutzung der vorhandenen Ressourcen sicherstellen.
- Der Zustand der Betroffenen kann sich im zeitlichen Verlauf verändern und möglicherweise schlagartig verschlechtern.
- Es gibt ein gültiges Sichtungssystem welches weltweit ausschließlich eingesetzt wird.

## Frage 14 - Dekontamination (1 Punkt)

Dekontamination...

Bitte wählen Sie maximal 1 von 4 Antworten!

- findet ausschließlich am Schadensort statt
- ist in den umliegenden Kliniken nicht notwendig
- sollte auch in Zielkliniken durchgeführt werden können
- wird zum größten Teil nicht durch die Entkleidung der Betroffenen erreicht

## Frage 15 - Psychologischer Support (1 Punkt)

Was gehört nicht zum psychologischen Support bei Katastrophen?

Bitte wählen Sie maximal 1 von 5 Antworten!

- Einsatzbewältigung
- Tiefenpsychologische Deutung nach Großschadensfällen
- Primäre Prävention
-

Einsatznachsorge

- Notfallnachsorge

### Frage 16 - Surge Capacity (1 Punkt)

Was gehört **nicht** zu den 4S der Surge Capacity?

Bitte wählen Sie maximal 1 von 4 Antworten!

- Symbols  
 Systems  
 Staff  
 Structure

### Frage 17 - Ten priorities (1 Punkt)

Zu den „ten priorities after disasters“ zählt **nicht**:

Bitte wählen Sie maximal 1 von 4 Antworten!

- Mediale Aufmerksamkeit  
 Masern Impfungen  
 Wasser und Sanitär  
 Nahrungsmittelsicherheit

### Frage 18 - Epidemien (1 Punkt)

Zu den häufigen Epidemien nach Katastrophen zählen **nicht**

Bitte wählen Sie maximal 1 von 4 Antworten!

- Hepatitis B  
 Malaria  
 Cholera  
 Masern

### Frage 19 - UN Organisationen (1 Punkt)

Die UN-Organisation, die auf die Koordinierung der Humanitären Hilfsmaßnahmen nach einer internationalen Katastrophe spezialisiert ist, heißt:

Bitte wählen Sie maximal 1 von 4 Antworten!

- ICRC  
 UN-HCR



UN-OCHA

Unicef

### Frage 20 - Wasser (1 Punkt)

Nach dem WASH Standard benötigt jeder Mensch täglich mindestens:

Bitte wählen Sie maximal 1 von 4 Antworten!

40 Liter Wasser

15 Liter Wasser

5 Liter Wasser

30 Liter Wasser

### Frage 21 - Triage 1 (1 Punkt)

Sichten Sie die folgenden Patienten nach START Triage

Rot: Lebensgefährlich verletzt

Gelb: Schwerverletzt

Grün: Leichtverletzt

Schwarz: Verstorben

30 Jahre weiblich

Kopfverletzung blutend, blasses Hautkolorit, nicht gehfähig

RR 160/90

HF 100

Normale Atmung

Ansprechbar, Verwirrt, folgt Aufforderungen nicht

Bitte wählen Sie maximal 1 von 4 Antworten!

Grün

Gelb

Rot

Schwarz

### Frage 22 - Triage 2 (1 Punkt)

Sichten Sie die folgenden Patienten nach START Triage

Rot: Lebensgefährlich verletzt

Gelb: Schwerverletzt

Grün: Leichtverletzt

Schwarz: Verstorben

70 Jahre weiblich

Brustschmerz

Keine äußerlichen Verletzungen

CPR <2sec

HF 120

AF 20/min

Zu schwach um Aufzustehen, nicht gehfähig

Orientiert

Bitte wählen Sie maximal 1 von 4 Antworten!

- Grün
- Gelb
- Rot
- Schwarz

---

### Frage 23 - Triage 3 (1 Punkt)

Sichten Sie die folgenden Patienten nach START Triage

Rot: Lebensgefährlich verletzt

Gelb: Schwerverletzt

Grün: Leichtverletzt

Schwarz: Verstorben

4 Jahre weiblich

Schreit und weint

Verletzung am rechten Auge, kann nichts sehen, weint, redet mit seiner Mutter

AF 44/min

Kapillare Reperfusion (CRP) <2s

gehfähig

Bitte wählen Sie maximal 1 von 4 Antworten!

- Grün
- Gelb
- Rot
- Schwarz

---

### Frage 24 - Triage 4 (1 Punkt)

Sichten Sie die folgenden Patienten nach START Triage

Rot: Lebensgefährlich verletzt

Gelb: Schwerverletzt

Grün: Leichtverletzt

Schwarz: Verstorben

Pat. Kommt wild gestikulierend mit blutenden oberflächlichen Schnittwunden an Armen und Beinen auf dich zu gerannt und ruft um Hilfe für eine Frau

Bitte wählen Sie maximal 1 von 4 Antworten!

- Grün
- Gelb
- Rot
- Schwarz

### Frage 25 - Triage 5 (1 Punkt)

Sichten Sie die folgenden Patienten nach START Triage

Rot: Lebensgefährlich verletzt

Gelb: Schwerverletzt

Grün: Leichtverletzt

Schwarz: Verstorben

32 Jahre, weiblich

Schwanger, 30.SSW

Ansprechbar, sehr aufgeregt

Starke Schmerzen im Bauch

CPR 5 sec

AF 24/min

Bitte wählen Sie maximal 1 von 4 Antworten!

- Grün
- Gelb
- Rot
- Schwarz

### Frage 26 - Triage 6 (1 Punkt)

Sichten Sie die folgenden Patienten nach START Triage

Rot: Lebensgefährlich verletzt

Gelb: Schwerverletzt

Grün: Leichtverletzt

Schwarz: Verstorben

36 Jahre, weiblich

blass, liegend

Keine Spontanatmung

Offene Thoraxverletzung

--> Nach Reklination Spontanatmung

--> AF 32/min

Bitte wählen Sie maximal 1 von 4 Antworten!

- Grün
- Gelb
- Rot
- Schwarz

### Frage 27 - Triage 7 (1 Punkt)

Sichten Sie die folgenden Patienten nach START Triage

Rot: Lebensgefährlich verletzt

Gelb: Schwerverletzt

Grün: Leichtverletzt

Schwarz: Verstorben

20 Jahre weiblich

26.SSW, gespanntes Abdomen, starke Schmerzen, nicht gehfähig

AF 28/min

CPR 4sec

Spontanatmend und orientiert

Bitte wählen Sie maximal 1 von 4 Antworten!

- Grün
- Gelb
- Rot
- Schwarz

### Frage 28 - Triage 8 (1 Punkt)

Sichten Sie die folgenden Patienten nach START Triage

Rot: Lebensgefährlich verletzt

Gelb: Schwerverletzt

Grün: Leichtverletzt

Schwarz: Verstorben

31 Jahre männlich

Offen gebrochener Unterschenkel, nicht gehfähig

Wach, orientiert

Spontanatmend

AF 27/min

CPR < 2sec

Bitte wählen Sie maximal 1 von 4 Antworten!

- Grün
- Gelb
- Rot
- Schwarz

### Frage 29 - Triage 9 (1 Punkt)

Sichten Sie die folgenden Patienten nach START Triage

Rot: Lebensgefährlich verletzt

Gelb: Schwerverletzt

Grün: Leichtverletzt

Schwarz: Verstorben

35 Jahre weiblich

Amputation rechter Unterarm

Wach, ansprechbar und orientiert, zu schwach aufzustehen

Arterielle Blutung steht nach Tourniquet-Anlage

AF 36/min

CPR 4sec

Bitte wählen Sie maximal 1 von 4 Antworten!

- Grün
- Rot
- Gelb
- Schwarz

### Frage 30 - Triage 10 (1 Punkt)

Sichten Sie die folgenden Patienten nach START Triage

Rot: Lebensgefährlich verletzt

Gelb: Schwerverletzt

Grün: Leichtverletzt

Schwarz: Verstorben

38 Jahre männlich

Liegt auf dem Bauch, keine Sensomotorik in der Unteren Extremität

AF 16

Wach und orientiert

CPR 2 sec

Bitte wählen Sie maximal 1 von 4 Antworten!

- Grün
- Gelb
- Rot
- Schwarz
