# Supplementary material
Source: PubMed Central journal article supplement (PMC8662900)
Supplement: 12909_2021_3043_MOESM4_ESM.pdf [file 12909_2021_3043_MOESM4_ESM.pdf]

## Supplemental Material

### Raw Data Objective Measurement of Knowledge - Results of the Compulsory Multiple Choice Test of Knowledge

| Testscore_pre | Testscore_post |
|---------------|----------------|
| 13            | 30             |
| 11            | 30             |
| 18            | 30             |
| 22            | 30             |
| 20            | 29             |
| 21            | 30             |
| 24            | 30             |
| 26            | 30             |
| 19            | 26             |
| 25            | 30             |
| 19            | 30             |
| 22            | 29             |
| 23            | 30             |
| 19            | 29             |
| 21            | 30             |
| 21            | 30             |
| 21            | 30             |
| 22            | 30             |
| 25            | 30             |
| 26            | 28             |
| 25            | 29             |
| 24            | 29             |
| 17            | 27             |
| 25            | 30             |
| 25            | 28             |
| 22            | 29             |
| 23            | 29             |
| 22            | 25             |
| 27            | 29             |
| 29            | 28             |
| 26            | 29             |
| 27            | 27             |
| 21            | 30             |
| 25            | 29             |
| 20            | 28             |
| 23            | 29             |
| 15            | 30             |
| 27            | 29             |
| 22            | 29             |
| 27            | 29             |
| 19            | 27             |
| 22            | 29             |
| 19            | 29             |
| 20            | 28             |
| 19            | 28             |
| 20            | 28             |
| 22            | 29             |
| 17            | 29             |
| 19            | 28             |
| 27            | 29             |
| 20            | 29             |
| 27            | 30             |
| 21            | 27             |
| 26            | 30             |
| 26            | 28             |
| 22            | 28             |
| 23            | 27             |
| 23            | 26             |
| 23            | 29             |
| 21            | 30             |
| 20            | 30             |
| 23            | 30             |
| 25            | 28             |
| 28            | 29             |
| 17            | 29             |
| 21            | 29             |
| 22            | 30             |
| 25            | 30             |
| 25            | 28             |
| 21            | 29             |
| 25            | 29             |
| 28            | 27             |
| 22            | 28             |
| 23            | 30             |
| 22            | 28             |
| 22            | 29             |
| 21            | 25             |
| 22            | 29             |
| 19            | 29             |
| 20            | 29             |
| 19            | 30             |
| 21            | 28             |
| 20            | 26             |
| 22            | 29             |
| 27            | 25             |
| 25            | 28             |
| 23            | 28             |
| 19            | 28             |
| 20            | 27             |
| 23            | 29             |
| 9             | 22             |
| 22            | 28             |
| 20            | 28             |
| 19            | 29             |
| 23            | 27             |
| 23            | 30             |
| 20            | 25             |
| 21            | 28             |
| 22            | 28             |
| 20            | 29             |
| 24            | 28             |
| 23            | 28             |
